# Supplementary material
Source: PubMed Central journal article supplement (PMC3196395)
Supplement: supp_85_19_9918__2.pdf [file supp_85_19_9918__2.pdf]

| Chimp ID <sup>1</sup> | Sex <sup>2</sup> | UG sample code | Collection date <sup>3</sup> | mtDNA haplotype <sup>4</sup> | Microsatellite loci <sup>5</sup> |         |         |         |         |         |         |         |         | SIVcpz fecal WB <sup>6</sup> | SIVcpz fecal vRNA | SIVcpz strain | Size of amplified SIV RNA <sup>7</sup> |            |      |          |        |  |
|-----------------------|------------------|----------------|------------------------------|------------------------------|----------------------------------|---------|---------|---------|---------|---------|---------|---------|---------|------------------------------|-------------------|---------------|----------------------------------------|------------|------|----------|--------|--|
|                       |                  |                |                              |                              | D18s536                          | D4s243  | D10s676 | D9s922  | D2s1326 | D2s1333 | D4s1627 | D9s905  | pol (s) |                              |                   |               | pol (l)                                | pol (mini) | gp41 | gp41/nef |        |  |
|                       |                  | 124            | 2-Oct-09                     | UG59                         | 139/159                          | 202/230 | 179/179 | 286/286 | 255/263 | 317/321 | 221/221 | 285/293 | neg     |                              |                   |               |                                        |            |      |          |        |  |
|                       |                  | 236            | 12-Oct-09                    | UG59                         | 139/159                          | 202/230 | 179/179 | 286/286 | 255/263 | 317/321 | 221/221 | 285/293 | neg     |                              |                   |               |                                        |            |      |          |        |  |
|                       |                  | 198            | 6-Nov-09                     | UG59                         | 139/159                          | 202/230 | 179/179 | 286/286 | 255/263 | 317/321 | 221/221 | 285/293 | neg     |                              |                   |               |                                        |            |      |          |        |  |
|                       |                  | 214            | 29-Nov-09                    | UG59                         | 139/159                          | 202/230 | 179/179 | 286/286 |         |         | 221/221 | 285/293 | neg     |                              |                   |               |                                        |            |      |          |        |  |
|                       |                  | 356            | 1-Feb-10                     | UG59                         | 139/159                          | 202/230 | 179/179 | 286/286 |         |         | 221/221 | 285/293 | neg     |                              |                   |               |                                        |            |      |          |        |  |
|                       |                  | 344            | 9-Feb-10                     | UG59                         | 139/159                          | 202/230 | 179/179 | 286/286 |         | 317/321 | 221/221 | 285/293 | neg     |                              |                   |               |                                        |            |      |          |        |  |
|                       |                  | 357            | 9-Feb-10                     | UG59                         | 139/159                          | 202/230 | 179/179 | 286/286 |         | 317/321 | 221/221 | 285/293 | neg     |                              |                   |               |                                        |            |      |          |        |  |
|                       | F                | 314            | 12-Feb-10                    | UG59                         |                                  |         | 179/179 | 286/286 |         |         | 221/221 | 285/293 | neg     |                              |                   |               |                                        |            |      |          |        |  |
|                       |                  | 324            | 12-Feb-10                    | UG59                         | 139/159                          | 202/230 | 179/179 | 286/286 |         |         | 221/221 | 285/293 | neg     |                              |                   |               |                                        |            |      |          |        |  |
|                       |                  | 326            | 12-Feb-10                    | UG59                         | 139/159                          | 202/230 | 179/179 | 286/286 |         | 317/321 | 221/221 | 285/293 | neg     |                              |                   |               |                                        |            |      |          |        |  |
| Ch-60                 | unk              | 189            | 31-Oct-09                    | UG59                         | 139/159                          | 202/230 | 175/183 | 270/290 | 231/231 |         | 221/221 | 269/269 | neg     |                              |                   |               |                                        |            |      |          |        |  |
| Ch-61                 | unk              | 283            | 2-Nov-09                     | UG59                         | 139/159                          | 230/230 | 175/183 | 270/286 | 251/263 |         | 221/233 | 269/285 | pos     | neg                          | --                | --            | --                                     | --         | --   | --       |        |  |
| Ch-62                 | M                | 63             | 30-Jul-09                    | UG59                         | 139/179                          | 198/198 | 183/183 | 270/290 | 263/263 | 321/325 | 221/233 | 285/293 | neg     |                              |                   |               |                                        |            |      |          |        |  |
|                       | M                | 92             | 9-Aug-09                     | UG59                         | 139/179                          | 198/198 | 183/183 | 270/290 | 263/263 | 321/325 | 221/233 | 285/293 | neg     |                              |                   |               |                                        |            |      |          |        |  |
| Ch-63                 | F                | 5              | 7-Mar-09                     | UG59                         | 159/---                          | 194/230 | 179/179 | 270/286 |         |         |         |         | neg     |                              |                   |               |                                        |            |      |          |        |  |
|                       | F                | 4              | 12-Mar-09                    | UG59                         | 159/175                          | 194/--- | 179/179 | 270/286 | ---     | /263    |         | 221/221 | 285/293 | neg                          |                   |               |                                        |            |      |          |        |  |
|                       | F                | 45             | 29-Jun-09                    | UG59                         | 159/---                          | 194/230 | 179/179 | 270/286 | 255/263 | 321/337 | 221/221 | 285/293 | neg     |                              |                   |               |                                        |            |      |          |        |  |
|                       | F                | 61             | 30-Jul-09                    | UG59                         | 159/---                          | 194/230 | 179/179 | 270/286 | 255/263 | 321/337 | 221/221 | 285/293 | neg     |                              |                   |               |                                        |            |      |          |        |  |
|                       | F                | 242            | 11-Oct-09                    | UG59                         | 159/---                          | 194/230 | 179/179 | 270/286 |         |         |         |         | neg     |                              |                   |               |                                        |            |      |          |        |  |
|                       |                  | 187            | 2-Nov-09                     | UG59                         | 159/---                          | 194/230 | 179/179 | 270/286 | 255/263 |         | 221/221 |         | neg     |                              |                   |               |                                        |            |      |          |        |  |
|                       | F                | 289            | 2-Nov-09                     | UG59                         | 159/---                          | 194/230 | 179/179 | 270/286 | 255/263 | 321/337 | 221/221 | 285/293 | neg     |                              |                   |               |                                        |            |      |          |        |  |
|                       |                  | 208            | 4-Nov-09                     | UG59                         | 159/---                          | 194/230 | 179/179 | 270/286 | 255/263 | 321/337 | 221/221 | 285/293 | neg     |                              |                   |               |                                        |            |      |          |        |  |
|                       | F                | 217            | 28-Nov-09                    | UG59                         | 159/---                          | 194/230 | 179/179 | 270/286 | 255/--- |         | 221/221 | 285/293 | neg     |                              |                   |               |                                        |            |      |          |        |  |
|                       | F                | 212            | 16-Dec-09                    | UG59                         | 159/---                          | ---     | 230     | 179/179 |         |         |         | ---     | 293     | neg                          |                   |               |                                        |            |      |          |        |  |
|                       |                  | 213            | 16-Dec-09                    | UG59                         | 159/---                          | 194/--- | 179/179 | 270/--- | ---     | /263    |         | 221/221 | 285/293 | neg                          |                   |               |                                        |            |      |          |        |  |
|                       |                  | 348            | 15-Feb-10                    | UG59                         | 159/---                          | 194/230 | 179/179 | 270/286 | 255/263 |         | 221/221 | 285/293 | neg     |                              |                   |               |                                        |            |      |          |        |  |
|                       | F                | 374            | n/a                          | UG59                         | 159/---                          | 194/230 | 179/179 | 270/286 | 255/263 | 321/337 | 221/221 | 285/293 | neg     |                              |                   |               |                                        |            |      |          |        |  |
| Ch-64                 | F                | 11             | 7-Mar-09                     | UG59                         | ---                              | 159     | 230/234 | 175/--- | 270/286 | 251/263 | 321/325 | 221/221 | 269/281 | neg                          |                   |               |                                        |            |      |          |        |  |
|                       | F                | 17             | 7-Mar-09                     | UG59                         | ---                              | 159     | 230/234 | 175/--- | 270/286 | 251/263 |         | 221/221 | 269/281 | neg                          | neg               | --            | --                                     | --         | --   | --       | --     |  |
|                       | F                | 59             | 30-Jul-09                    | UG59                         | ---                              | 159     | 230/234 | 175/--- | 270/286 | 251/263 | 321/325 | 221/221 | 269/281 | pos                          | pos               | UG59          | --                                     | --         | --   | 269 bp   | 728 bp |  |
|                       |                  | 286            | 2-Nov-09                     | UG59                         | ---                              | 159     | 230/234 | 175/--- | 270/286 | 251/263 |         | 221/221 | 269/281 | pos                          | neg               | --            | --                                     | --         | --   | --       | --     |  |
|                       |                  | 206            | 4-Nov-09                     | UG59                         | ---                              | 159     | 230/234 | 175/--- | 270/286 | 251/263 | 321/325 | 221/221 | 269/281 | pos                          | neg               | --            | --                                     | --         | --   | --       | --     |  |
|                       |                  | 177            | 20-Dec-09                    | UG59                         | ---                              | 159     | 230/234 | 175/--- | ---     | 286     | 251/263 | 221/221 | 269/281 | pos                          | neg               | --            | --                                     | --         | --   | --       | --     |  |
|                       |                  | 167            | 29-Dec-09                    | UG59                         | 139/159                          | 230/234 | 175/179 | 270/286 | 251/263 |         | 221/221 | 269/281 | pos     | neg                          | --                | --            | --                                     | --         | --   | --       | --     |  |
|                       |                  | 317            | 15-Feb-10                    | UG59                         | ---                              | 159     | 230/234 | 175/--- | 270/286 | 251/263 | 321/325 | 221/221 | 269/281 | pos                          | neg               | --            | --                                     | --         | --   | --       | --     |  |
|                       |                  | 308            | 22-Feb-10                    | UG59                         | ---                              | 159     | 230/234 | 175/--- | 270/286 | 251/263 |         | 221/221 | 269/281 | pos                          | neg               | --            | --                                     | --         | --   | --       | --     |  |
|                       |                  | 309            | 22-Feb-10                    | UG59                         | ---                              | 159     | 230/234 | 175/--- | 270/286 | 251/263 | 321/325 | 221/221 | 269/281 | pos                          | neg               | --            | --                                     | --         | --   | --       | --     |  |
| Ch-65                 | M                | 114            | 26-Oct-09                    | UG59                         | 159/159                          | 194/230 | 175/183 | 282/298 | 251/255 | 317/317 | 221/233 | 281/285 | neg     |                              |                   |               |                                        |            |      |          |        |  |
| Ch-66                 | M                | 9              | 24-Feb-09                    | UG59                         | 159/175                          | 198/202 | 183/183 | 282/290 | 259/263 | 321/325 | ---     | 233     | 269/293 | neg                          |                   |               |                                        |            |      |          |        |  |
|                       | M                | 10             | 24-Feb-09                    | UG59                         | 159/175                          | 198/202 | 183/183 | 282/290 | 259/263 | 321/325 | 229/233 | 269/293 | neg     |                              |                   |               |                                        |            |      |          |        |  |
|                       | M                | 14             | 8-Mar-09                     | UG59                         | 159/175                          | 198/202 | 183/183 | 282/290 | 259/263 | 321/325 | 229/233 | 269/293 | neg     |                              |                   |               |                                        |            |      |          |        |  |
|                       | M                | 16             | 20-Mar-09                    | UG59                         | 159/175                          | 198/202 | 183/183 | 282/290 | 259/263 | 321/325 | 229/233 | 269/293 | neg     |                              |                   |               |                                        |            |      |          |        |  |
|                       |                  | 62             | 30-Jul-09                    | UG59                         | 159/175                          | 198/202 | 183/183 | 282/290 | 259/263 | 321/325 | 229/233 | 269/293 | neg     |                              |                   |               |                                        |            |      |          |        |  |
|                       |                  | 110            | 26-Oct-09                    | UG59                         | 159/175                          | 198/202 | 183/183 | 282/290 | 259/263 | 321/325 | ---     | 233     | 269/293 | neg                          |                   |               |                                        |            |      |          |        |  |
|                       |                  | 115            | 26-Oct-09                    | UG59                         | 159/175                          | 198/202 | 183/183 | 282/290 | 259/263 | 321/325 | ---     | 233     | 269/293 | neg                          |                   |               |                                        |            |      |          |        |  |
|                       |                  | 288            | 1-Nov-09                     | UG59                         | 159/175                          | 198/202 | 183/183 | 282/290 | 259/263 | 321/325 | ---     | 233     | 269/293 | neg                          |                   |               |                                        |            |      |          |        |  |
|                       |                  | 322            | 15-Feb-10                    | UG59                         | 159/175                          | 198/202 | 183/183 | 282/290 | 259/263 | 321/325 | ---     | 233     | 269/293 | neg                          |                   |               |                                        |            |      |          |        |  |
|                       |                  | 354            | 15-Feb-10                    | UG59                         | 159/175                          | 198/202 | 183/183 | 282/290 | 259/263 |         | ---     | 233     | 269/293 | neg                          |                   |               |                                        |            |      |          |        |  |
|                       |                  | 304            | 22-Feb-10                    | UG59                         | 159/175                          | 198/202 | 183/183 | 282/290 | 259/263 | 321/325 | 229/233 | 269/293 | neg     |                              |                   |               |                                        |            |      |          |        |  |
|                       | M                | 343            | 23-Feb-10                    | UG59                         | 159/175                          | 198/202 | 183/183 | 282/290 | 259/263 |         | ---     | 233     | 269/293 | neg                          |                   |               |                                        |            |      |          |        |  |
| Ch-67                 | F                | 1              | 9-Mar-09                     | UG59                         | 175/179                          | 194/198 | 183/191 | 270/290 | 263/263 | 321/321 | 233/233 | 269/293 | neg     |                              |                   |               |                                        |            |      |          |        |  |
|                       |                  | 111            | 26-Oct-09                    | UG59                         | 175/179                          | 194/198 | 183/191 | 270/290 | 263/263 |         | 233/233 | 269/293 | neg     |                              |                   |               |                                        |            |      |          |        |  |
|                       |                  | 277            | 18-Nov-09                    | UG59                         | 175/179                          | 194/198 | 183/191 | 270/290 | 263/263 |         | 233/233 | 269/293 | neg     |                              |                   |               |                                        |            |      |          |        |  |
|                       |                  | 320            | 15-Feb-10                    | UG59                         | 175/179                          | 194/198 | 183/191 | 270/290 | 263/263 | 321/321 | 233/233 | 269/293 | neg     |                              |                   |               |                                        |            |      |          |        |  |
|                       |                  | 342            | 22-Feb-10                    | UG59                         | 175/179                          | 194/198 | 183/191 | 270/290 | 263/263 |         | 233/233 | 269/293 | neg     |                              |                   |               |                                        |            |      |          |        |  |
| Ch-68                 | F                | 376            | 23-Mar-10                    | MH32                         | 151/159                          | 202/234 | 179/179 | 282/286 | 255/263 | 321/325 | 221/233 | 269/293 | neg     |                              |                   |               |                                        |            |      |          |        |  |
| Ch-69                 | M                | 378            | 23-Mar-10                    | UG59                         | 139/139                          | 230/230 | 175/183 | 270/286 | 231/255 | 325/337 | 221/225 | 285/293 | neg     |                              |                   |               |                                        |            |      |          |        |  |
| Ch-70                 | M                | 379            | 23-Mar-10                    | GM7                          | 171/175                          | 194/230 | 175/175 | 270/286 | 259/263 | 321/321 | 221/225 | 285/293 | neg     |                              |                   |               |                                        |            |      |          |        |  |
| Ch-71                 | M                | 380            | 23-Mar-10                    | MH37                         | 139/139                          | 202/218 | 179/179 | 290/298 | 251/263 | 321/321 | 221/221 | 293/293 | neg     |                              |                   |               |                                        |            |      |          |        |  |
| Ch-72                 | M                | 381            | 23-Mar-10                    | UG59                         | 135/139                          | 198/218 | 179/179 | 286/290 | 251/263 | 321/321 | 221/225 | 285/285 | neg     |                              |                   |               |                                        |            |      |          |        |  |

<sup>1</sup>Black, uninfected; red, infected. Ch-01 to Ch-67 were sampled in the Issa Valley; Ch-68 to Ch-72 were sampled at a single site near the Shangwa River (Fig. 1B).

<sup>2</sup>F, female; M, male; unk, unknown.

<sup>3</sup>n/a, not available.

<sup>4</sup>MH and GM haplotypes were previously reported (15, 20, 37); UG haplotypes have been deposited in Genbank (accession numbers JN091703 and JN091704).

<sup>5</sup>Microsatellite loci are indicated. Alleles that did not amplify are indicated with dashed lines. Loci that failed to amplify are left blank.

<sup>6</sup>pos, positive; neg, negative.

<sup>7</sup>pFL, partial full-length genome; FL, full-length genome.
