# Supplementary material
Source: PubMed Central journal article supplement (PMC3196395)

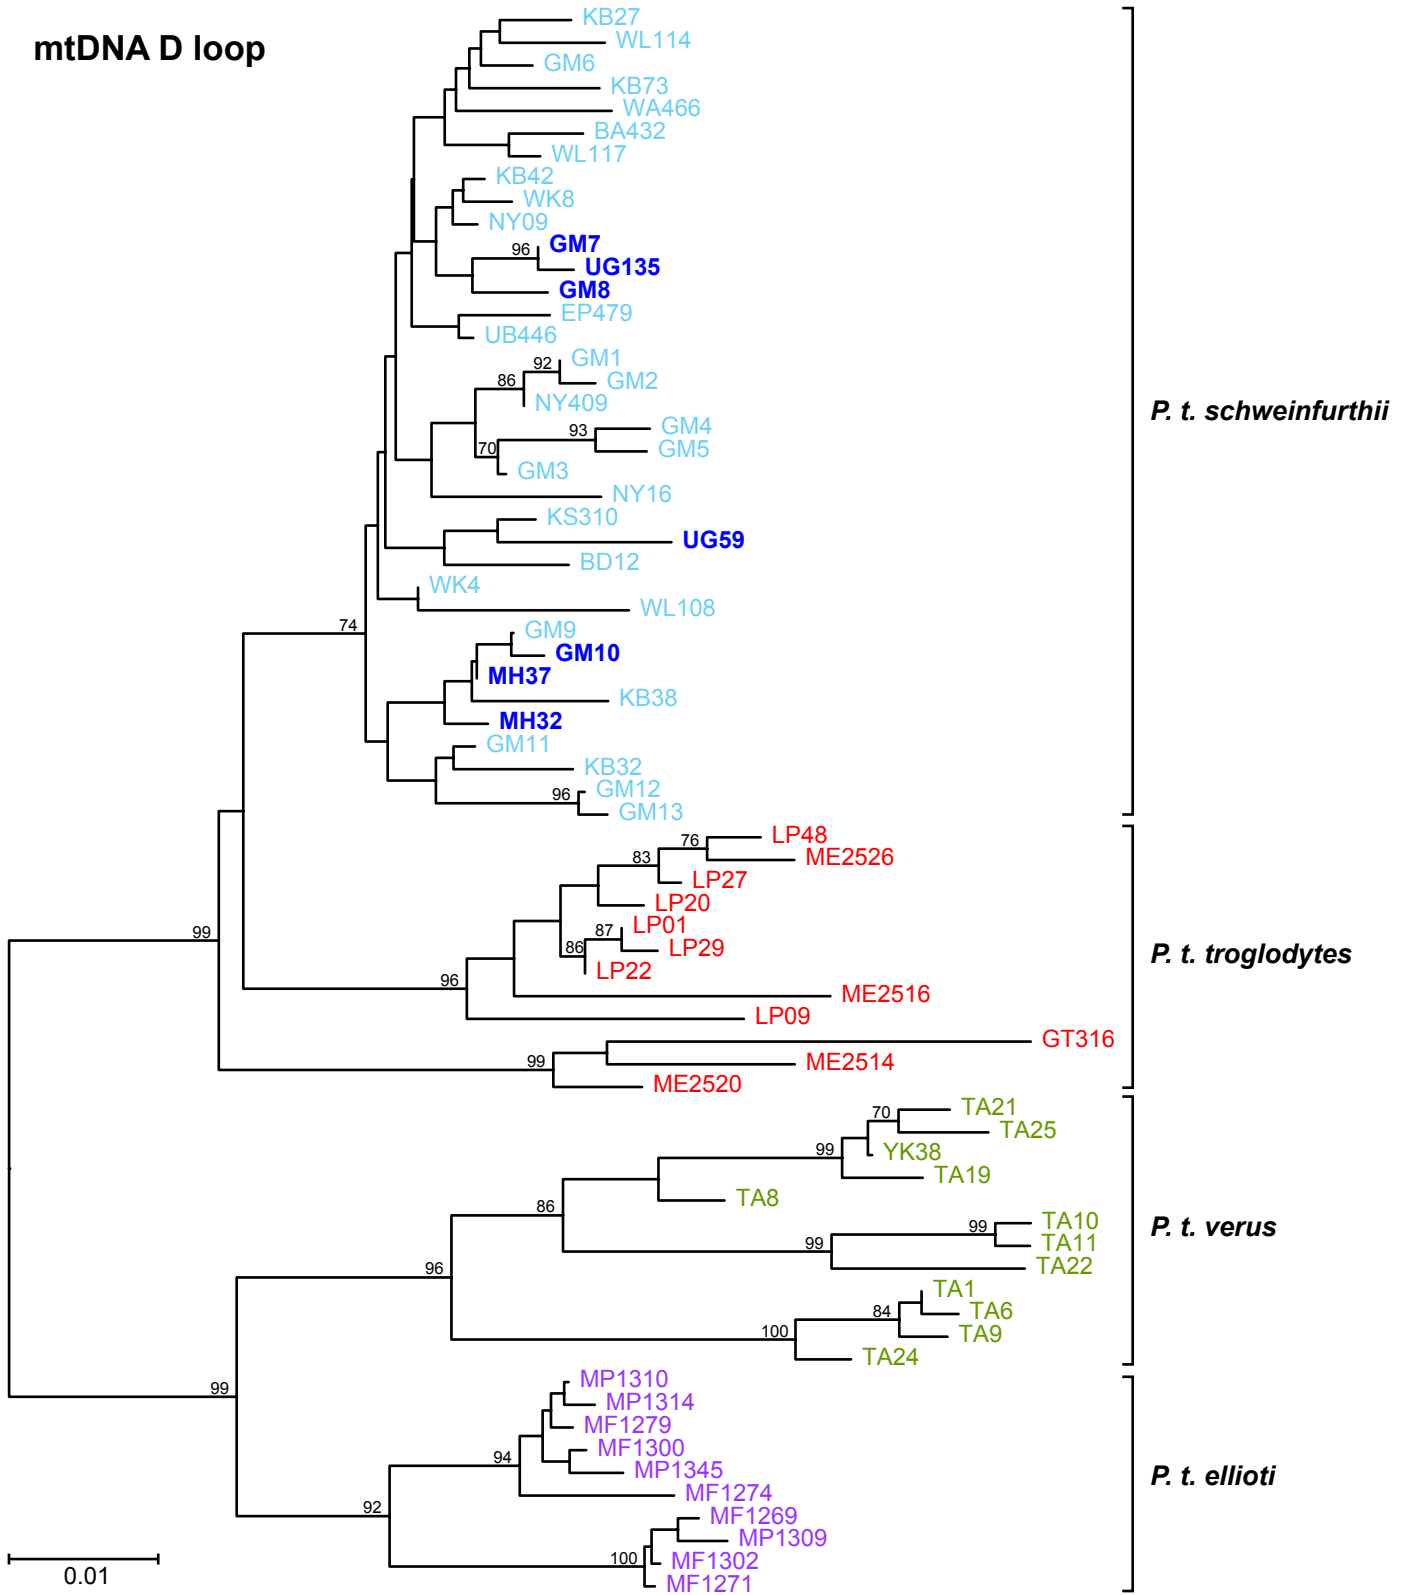

**Supplemental Figure S1**

Supplement: supp_85_19_9918__1.pdf [file supp_85_19_9918__1.pdf]
